# Supplementary material for: Survival of adult AML patients treated with chemotherapy in the U.S. population by age, race and ethnicity, sex, calendar-year period, and AML subgroup, 2001–2019
Source: PubMed Central journal article supplement (PMC10957373; doi:10.1016/j.eclinm.2024.102549), 2024-03-16
Supplement: mmc1.pdf [file mmc1.pdf]

**Table S1.** Frequency distribution, International Classification of Diseases for Oncology (third edition) codes, median age, and relative survival of AML subgroups/subtypes of adults (ages  $\geq 20$  years at AML diagnosis) with diagnostically confirmed first primary AML who were diagnosed 2001-2018 (followed through 2019) and reported to have received initial chemotherapy for AML, SEER-17

| Subgroup/subtype                                                    | ICD-O-3 morphology/<br>behavior codes | N             | Median age at diagnosis,<br>years (IQR) | Relative survival (%) according to time since AML diagnosis |                         |                         |                         |
|---------------------------------------------------------------------|---------------------------------------|---------------|-----------------------------------------|-------------------------------------------------------------|-------------------------|-------------------------|-------------------------|
|                                                                     |                                       |               |                                         | 1-month                                                     | 1-year                  | 3-year                  | 5-year                  |
|                                                                     |                                       |               |                                         | % (95% CI)                                                  | % (95% CI)              | % (95% CI)              | % (95% CI)              |
| <b>APL (AML with t(15;17)(q22;q12))</b>                             | 9866/3                                | <b>3,141</b>  | <b>47 (35-59)</b>                       | <b>90.2 (89.1-91.2)</b>                                     | <b>85.0 (83.7-86.2)</b> | <b>82.1 (80.6-83.5)</b> | <b>79.9 (78.2-81.4)</b> |
| <b>CBF AML</b>                                                      | *                                     | <b>1,085</b>  | <b>49 (35-62)</b>                       | <b>95.3 (93.8-96.4)</b>                                     | <b>76.3 (73.6-78.8)</b> | <b>58.7 (55.5-61.7)</b> | <b>54.4 (51.2-57.6)</b> |
| AML, t(8;21)(q22;q22)                                               | 9896/3                                | 597           | 50 (35-63)                              | 96.4 (94.5-97.6)                                            | 73.3 (69.5-76.7)        | 52.6 (48.3-56.8)        | 48.0 (43.6-52.2)        |
| AML with inv(16)(p13.1;q22) or t(16;16)(p13.1;q22)                  | 9871/3                                | 488           | 47 (36-60)                              | 93.9 (91.4-95.7)                                            | 79.9 (76.0-83.3)        | 66.1 (61.4-70.3)        | 62.2 (57.3-66.7)        |
| <b>AML with antecedent condition/therapy</b>                        | *                                     | <b>1,983</b>  | <b>67 (57-74)</b>                       | <b>92.6 (91.4-93.7)</b>                                     | <b>45.6 (43.3-47.8)</b> | <b>19.4 (17.6-21.3)</b> | <b>15.5 (13.8-17.3)</b> |
| AML with myelodysplasia-related changes                             | 9895/3                                | 1,848         | 67 (57-75)                              | 92.3 (91.0-93.5)                                            | 44.8 (42.5-47.1)        | 19.1 (17.2-21.0)        | 15.3 (13.6-17.2)        |
| Therapy-related myeloid neoplasm                                    | 9920/3                                | 52            | 62 (54-72)                              | 92.5 (80.8-97.2)                                            | 52.7 (38.1-65.3)        | 29.8 (17.9-42.7)        | 26.3 (14.9-39.2)        |
| Therapy-related MDS, NOS <sup>†</sup>                               | 9987/3                                | 28            | 58 (49-71)                              | 100                                                         | 65.2 (44.2-79.9)        | 18.6 (6.7-35.1)         | 11.4 (2.9-26.5)         |
| Refractory anemia with excess blasts in transformation <sup>‡</sup> | 9984/3                                | 52            | 66 (53-73)                              | 98.3 (85.9-99.8)                                            | 53.0 (38.4-65.7)        | 19.1 (9.4-31.4)         | 10.8 (4.0-21.6)         |
| Myeloid leukemia associated with Down syndrome                      | 9898/3                                | <25           | 22 (21-38)                              | –                                                           | –                       | –                       | –                       |
| <b>All other AML</b>                                                | *                                     | <b>22,264</b> | <b>62 (49-72)</b>                       | <b>89.3 (88.9-89.7)</b>                                     | <b>51.6 (51.0-52.3)</b> | <b>29.7 (29.1-30.4)</b> | <b>25.4 (24.8-26.0)</b> |
| AML, NOS                                                            | 9861/3                                | 14,223        | 63 (50-72)                              | 89.4 (88.8-89.9)                                            | 51.2 (50.4-52.0)        | 29.0 (28.2-29.8)        | 24.5 (23.8-25.3)        |
| Myeloid sarcoma                                                     | 9930/3                                | 197           | 53 (39-66)                              | 98.6 (95.3-99.6)                                            | 57.4 (50.1-64.0)        | 44.0 (36.8-51.0)        | 38.4 (31.2-45.6)        |
| Acute panmyelosis with myelofibrosis                                | 9931/3                                | 109           | 62 (54-72)                              | 98.3 (92.6-99.6)                                            | 72.9 (63.2-80.5)        | 41.1 (31.3-50.5)        | 24.1 (15.8-33.5)        |
| AML with minimal differentiation                                    | 9872/3                                | 617           | 62 (48-72)                              | 88.5 (85.6-90.8)                                            | 49.6 (45.5-53.5)        | 30.0 (26.3-33.8)        | 24.6 (21.1-28.4)        |
| AML without maturation                                              | 9873/3                                | 1,115         | 59 (45-69)                              | 89.9 (88.0-91.5)                                            | 53.2 (50.2-56.1)        | 31.8 (29.0-34.7)        | 28.2 (25.4-31.0)        |
| AML with maturation                                                 | 9874/3                                | 1,153         | 60 (48-71)                              | 93.1 (91.5-94.5)                                            | 57.2 (54.3-60.1)        | 33.4 (30.6-36.2)        | 28.1 (25.4-30.9)        |
| Acute myelomonocytic leukemia                                       | 9867/3                                | 2,305         | 59 (47-70)                              | 87.3 (85.9-88.6)                                            | 51.6 (49.5-53.7)        | 30.9 (28.9-32.8)        | 26.9 (25.0-28.9)        |
| Acute monoblastic and monocytic leukemia                            | 9891/3                                | 1,739         | 59 (46-69)                              | 85.4 (83.7-87.0)                                            | 50.5 (48.1-52.9)        | 29.9 (27.7-32.2)        | 27.0 (24.8-29.2)        |
| Acute erythroid leukemia                                            | 9840/3                                | 384           | 63 (52-71)                              | 94.2 (91.3-96.1)                                            | 45.2 (40.1-50.2)        | 21.0 (17.0-25.4)        | 16.8 (13.0-21.0)        |
| Acute megakaryoblastic leukemia                                     | 9910/3                                | 92            | 57 (44-67)                              | 89.3 (80.8-94.1)                                            | 27.5 (18.8-36.9)        | 13.1 (7.0-21.0)         | 11.8 (6.1-19.6)         |
| Acute basophilic leukemia                                           | 9870/3                                | <25           | 64 (47-82)                              | –                                                           | –                       | –                       | –                       |
| AML with t(9;11)(p22;q23)                                           | 9897/3                                | 222           | 53 (38-66)                              | 92.9 (88.6-95.6)                                            | 58.6 (51.7-64.8)        | 32.3 (26.1-38.7)        | 27.8 (21.7-34.3)        |
| AML (megakaryoblastic) with t(1;22)(p13;q13)                        | 9911/3                                | <25           | 58 (43-69)                              | –                                                           | –                       | –                       | –                       |
| AML with t(6;9)(p23;q34)                                            | 9865/3                                | 46            | 61 (45-66)                              | 93.6 (81.1-97.9)                                            | 66.0 (50.2-77.9)        | 34.4 (20.2-49.1)        | 23.3 (10.4-39.1)        |
| AML, inv(3)(q21;q26.2) or t(3;3)(q21;q26.2)                         | 9869/3                                | 35            | 60 (42-70)                              | 97.3 (80.7-99.6)                                            | 36.7 (20.9-52.5)        | 23.1 (10.2-38.9)        | 23.1 (10.2-38.9)        |

Abbreviations: AML, acute myeloid leukemia; APL, acute promyelocytic leukemia; CBF, core binding factor; CI, confidence interval; ICD-O-3, International Classification of Diseases for Oncology (third edition); IQR, interquartile range; MDS, myelodysplastic syndrome; NOS, not otherwise specified; SEER-17, 17 cancer registry areas of the Surveillance, Epidemiology, and End Results Program; <25, data points with fewer than 25 cases are suppressed to protect patient confidentiality; –, not applicable.

\* Includes ICD-O-3 codes for subtypes listed below the respective subgroup.

<sup>†</sup> Code became obsolete in 2010 and entity coded as 9920/3.

<sup>‡</sup> Code obsolete in 2010 and entity coded as 9983/3.
